# Supplementary material for: Oxygen induces the expression of invasion and stress response genes in the anaerobic salmon parasite Spironucleus salmonicida
Source: PubMed Central journal article supplement (PMC6397501; doi:10.1186/s12915-019-0634-8), 2019-03-01

*ruberythrin 2*  
SS50377\_11802

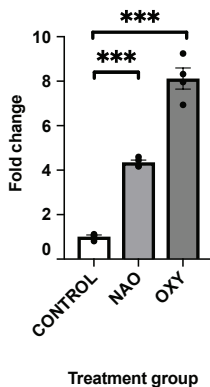

*nitroreductase*  
SS50377\_18652

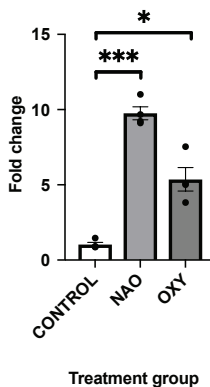

*flavodoxin*  
SS50377\_13883

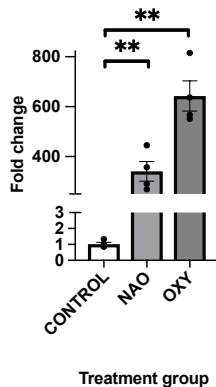

*nadh oxidoreductase*  
SS50377\_19201

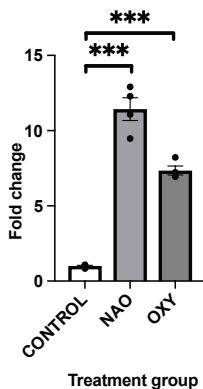

*msrA*  
SS50377\_17334

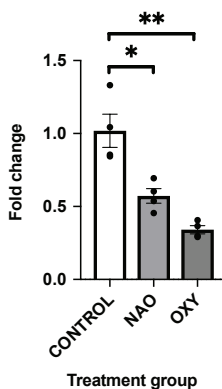

*msrB*  
SS50377\_12928

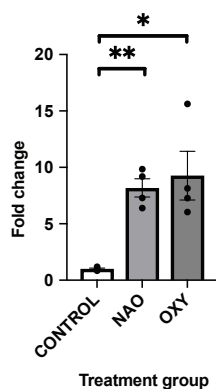

Supplement: 12915_2019_634_MOESM4_ESM.pdf [file 12915_2019_634_MOESM4_ESM.pdf]
