# Supplementary material for: Oxygen induces the expression of invasion and stress response genes in the anaerobic salmon parasite Spironucleus salmonicida
Source: PubMed Central journal article supplement (PMC6397501; doi:10.1186/s12915-019-0634-8), 2019-03-01
Supplement: 12915_2019_634_MOESM6_ESM.pdf [file 12915_2019_634_MOESM6_ESM.pdf]

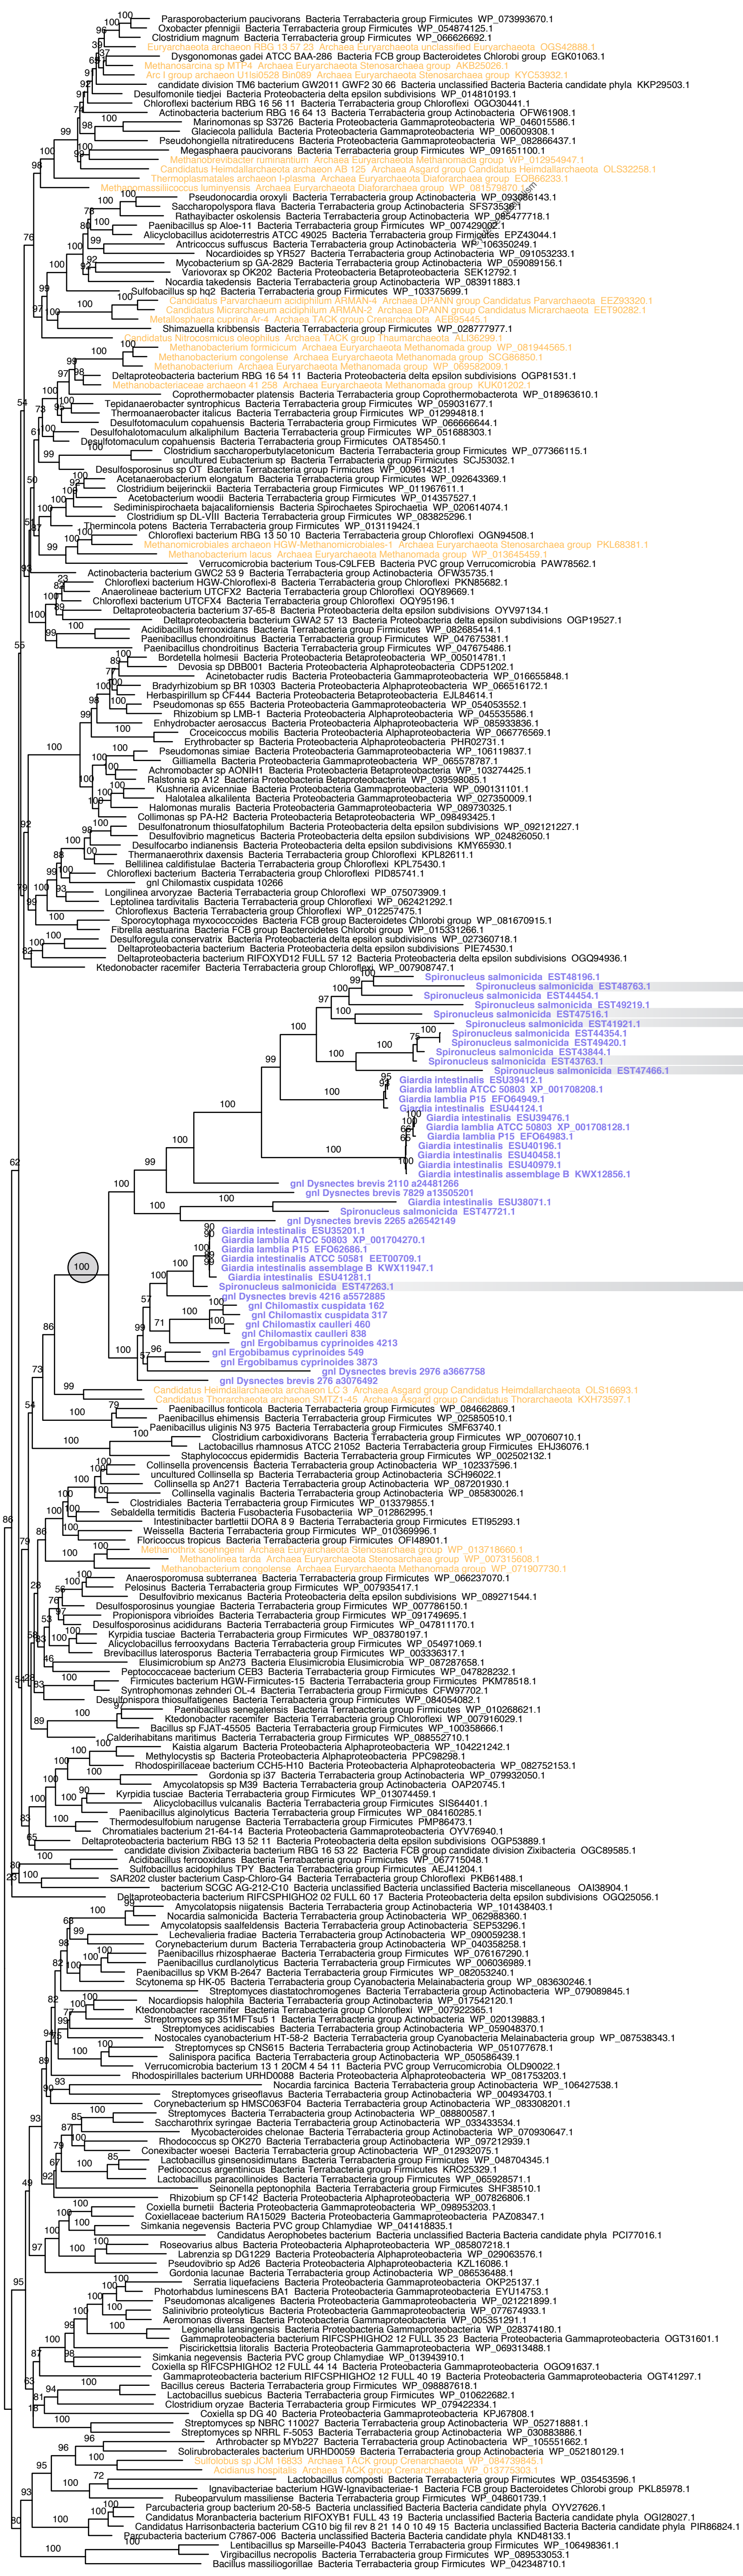

Major facilitator protein  
388 sites  
272 taxa  
LG+C50+G

Excavates  
Fornicates  
Eukaryotes  
Bacteria  
Archaea

Bipartition supporting  
Diplomonad monophyly



**MatE**  
 382 sites  
 289 taxa  
 LG+C50+G

Excavates  
 Fornicates  
 Eukaryotes  
 Bacteria  
 Archaea

Bipartition supporting sister relationship to prokaryotes

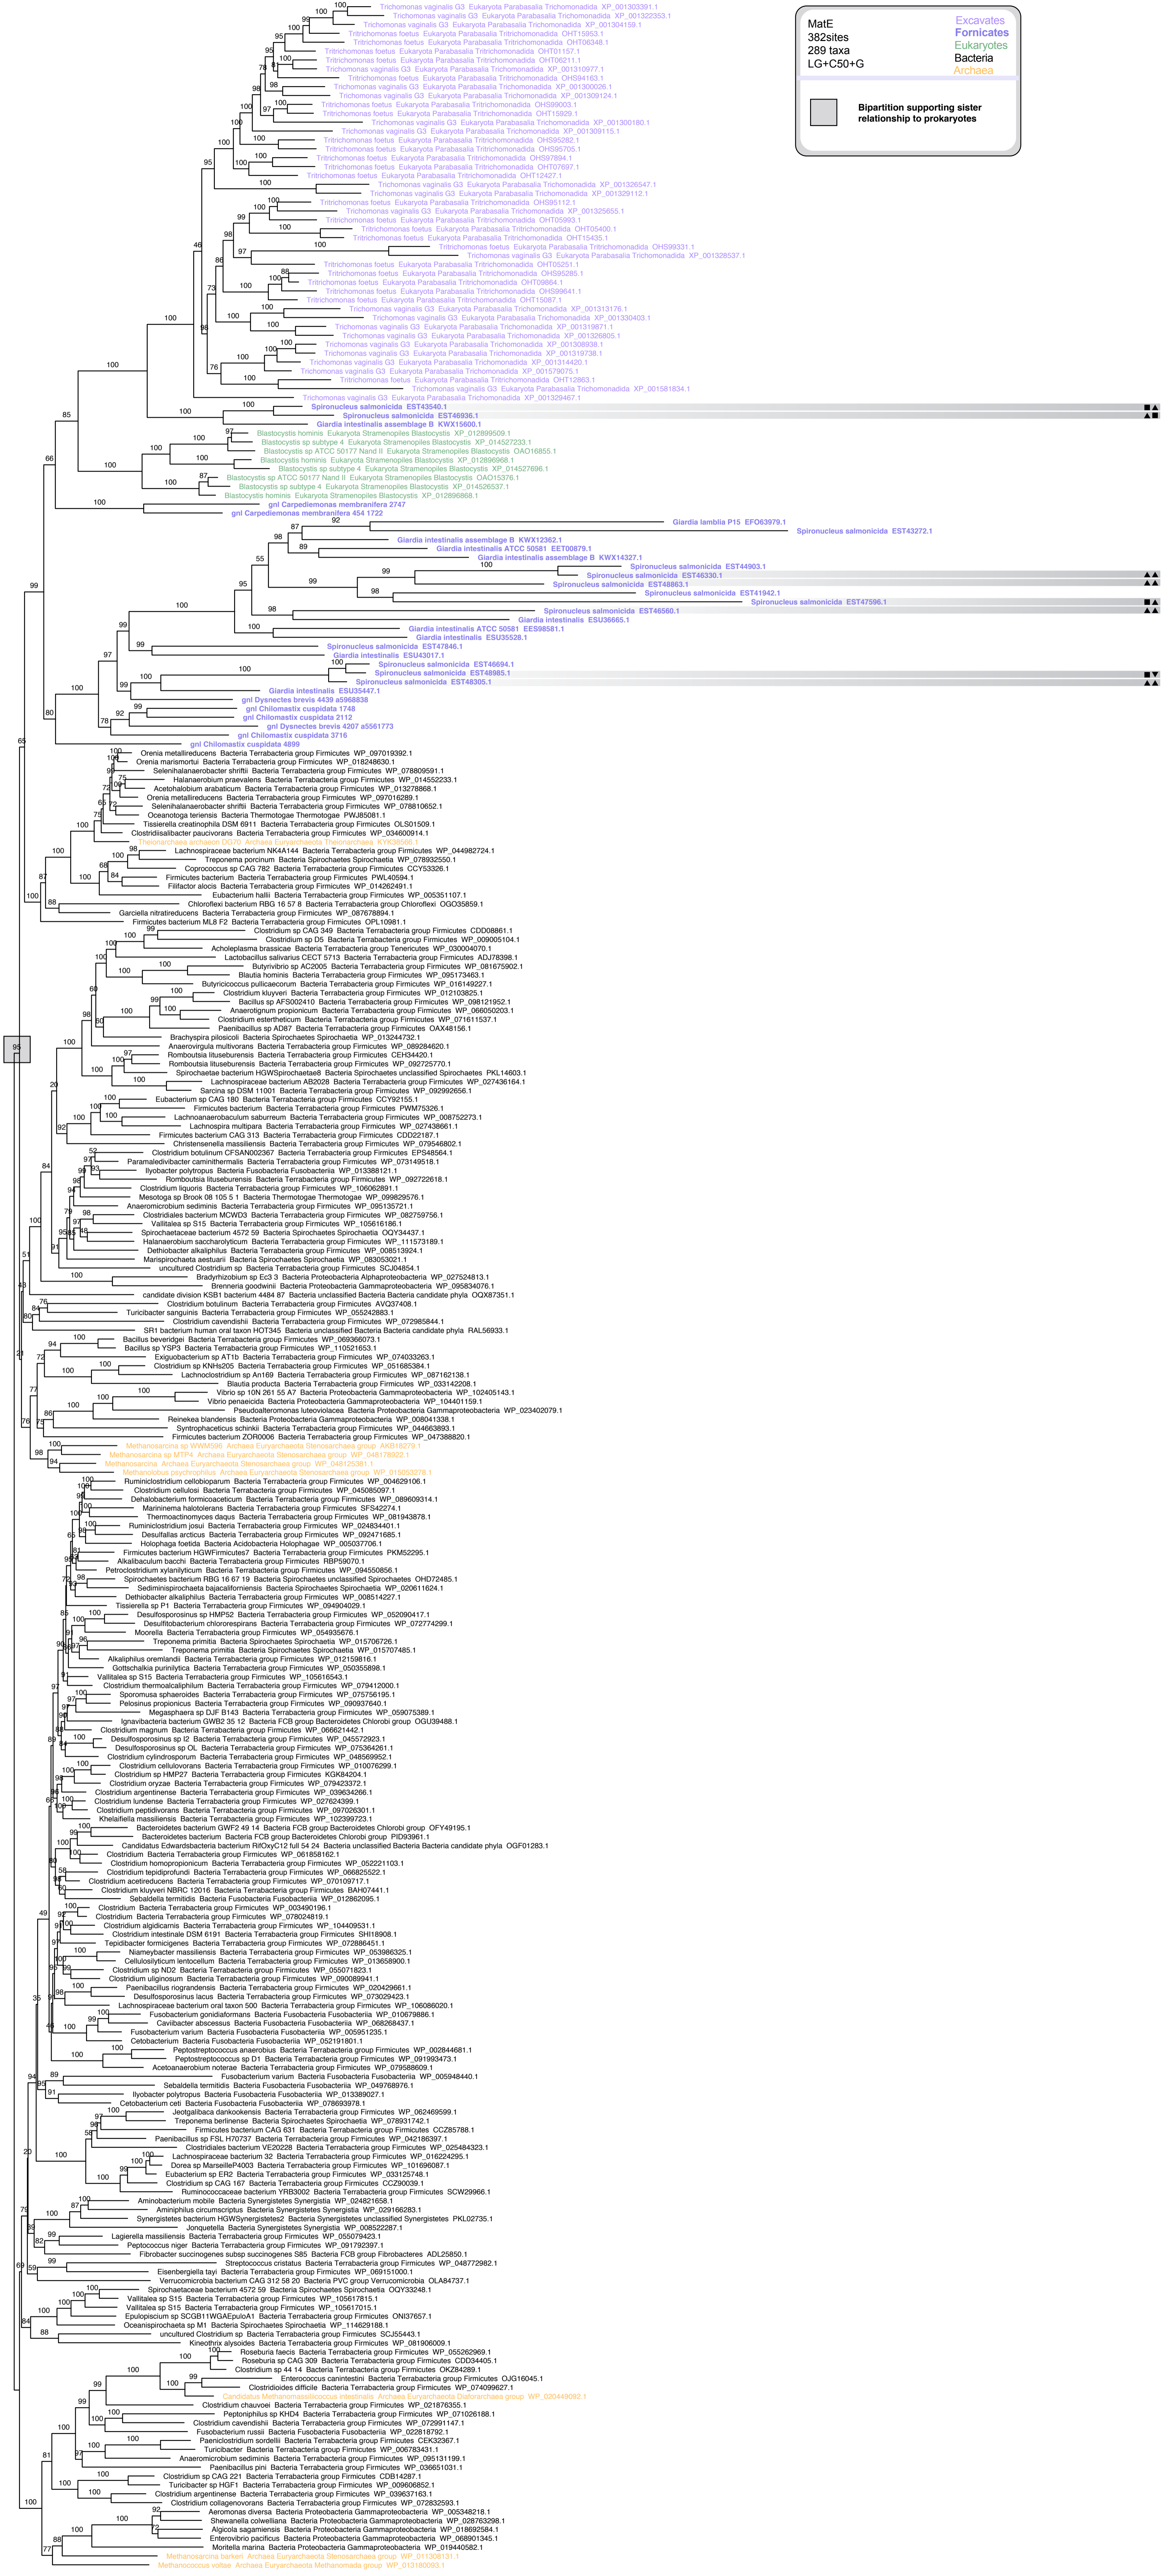



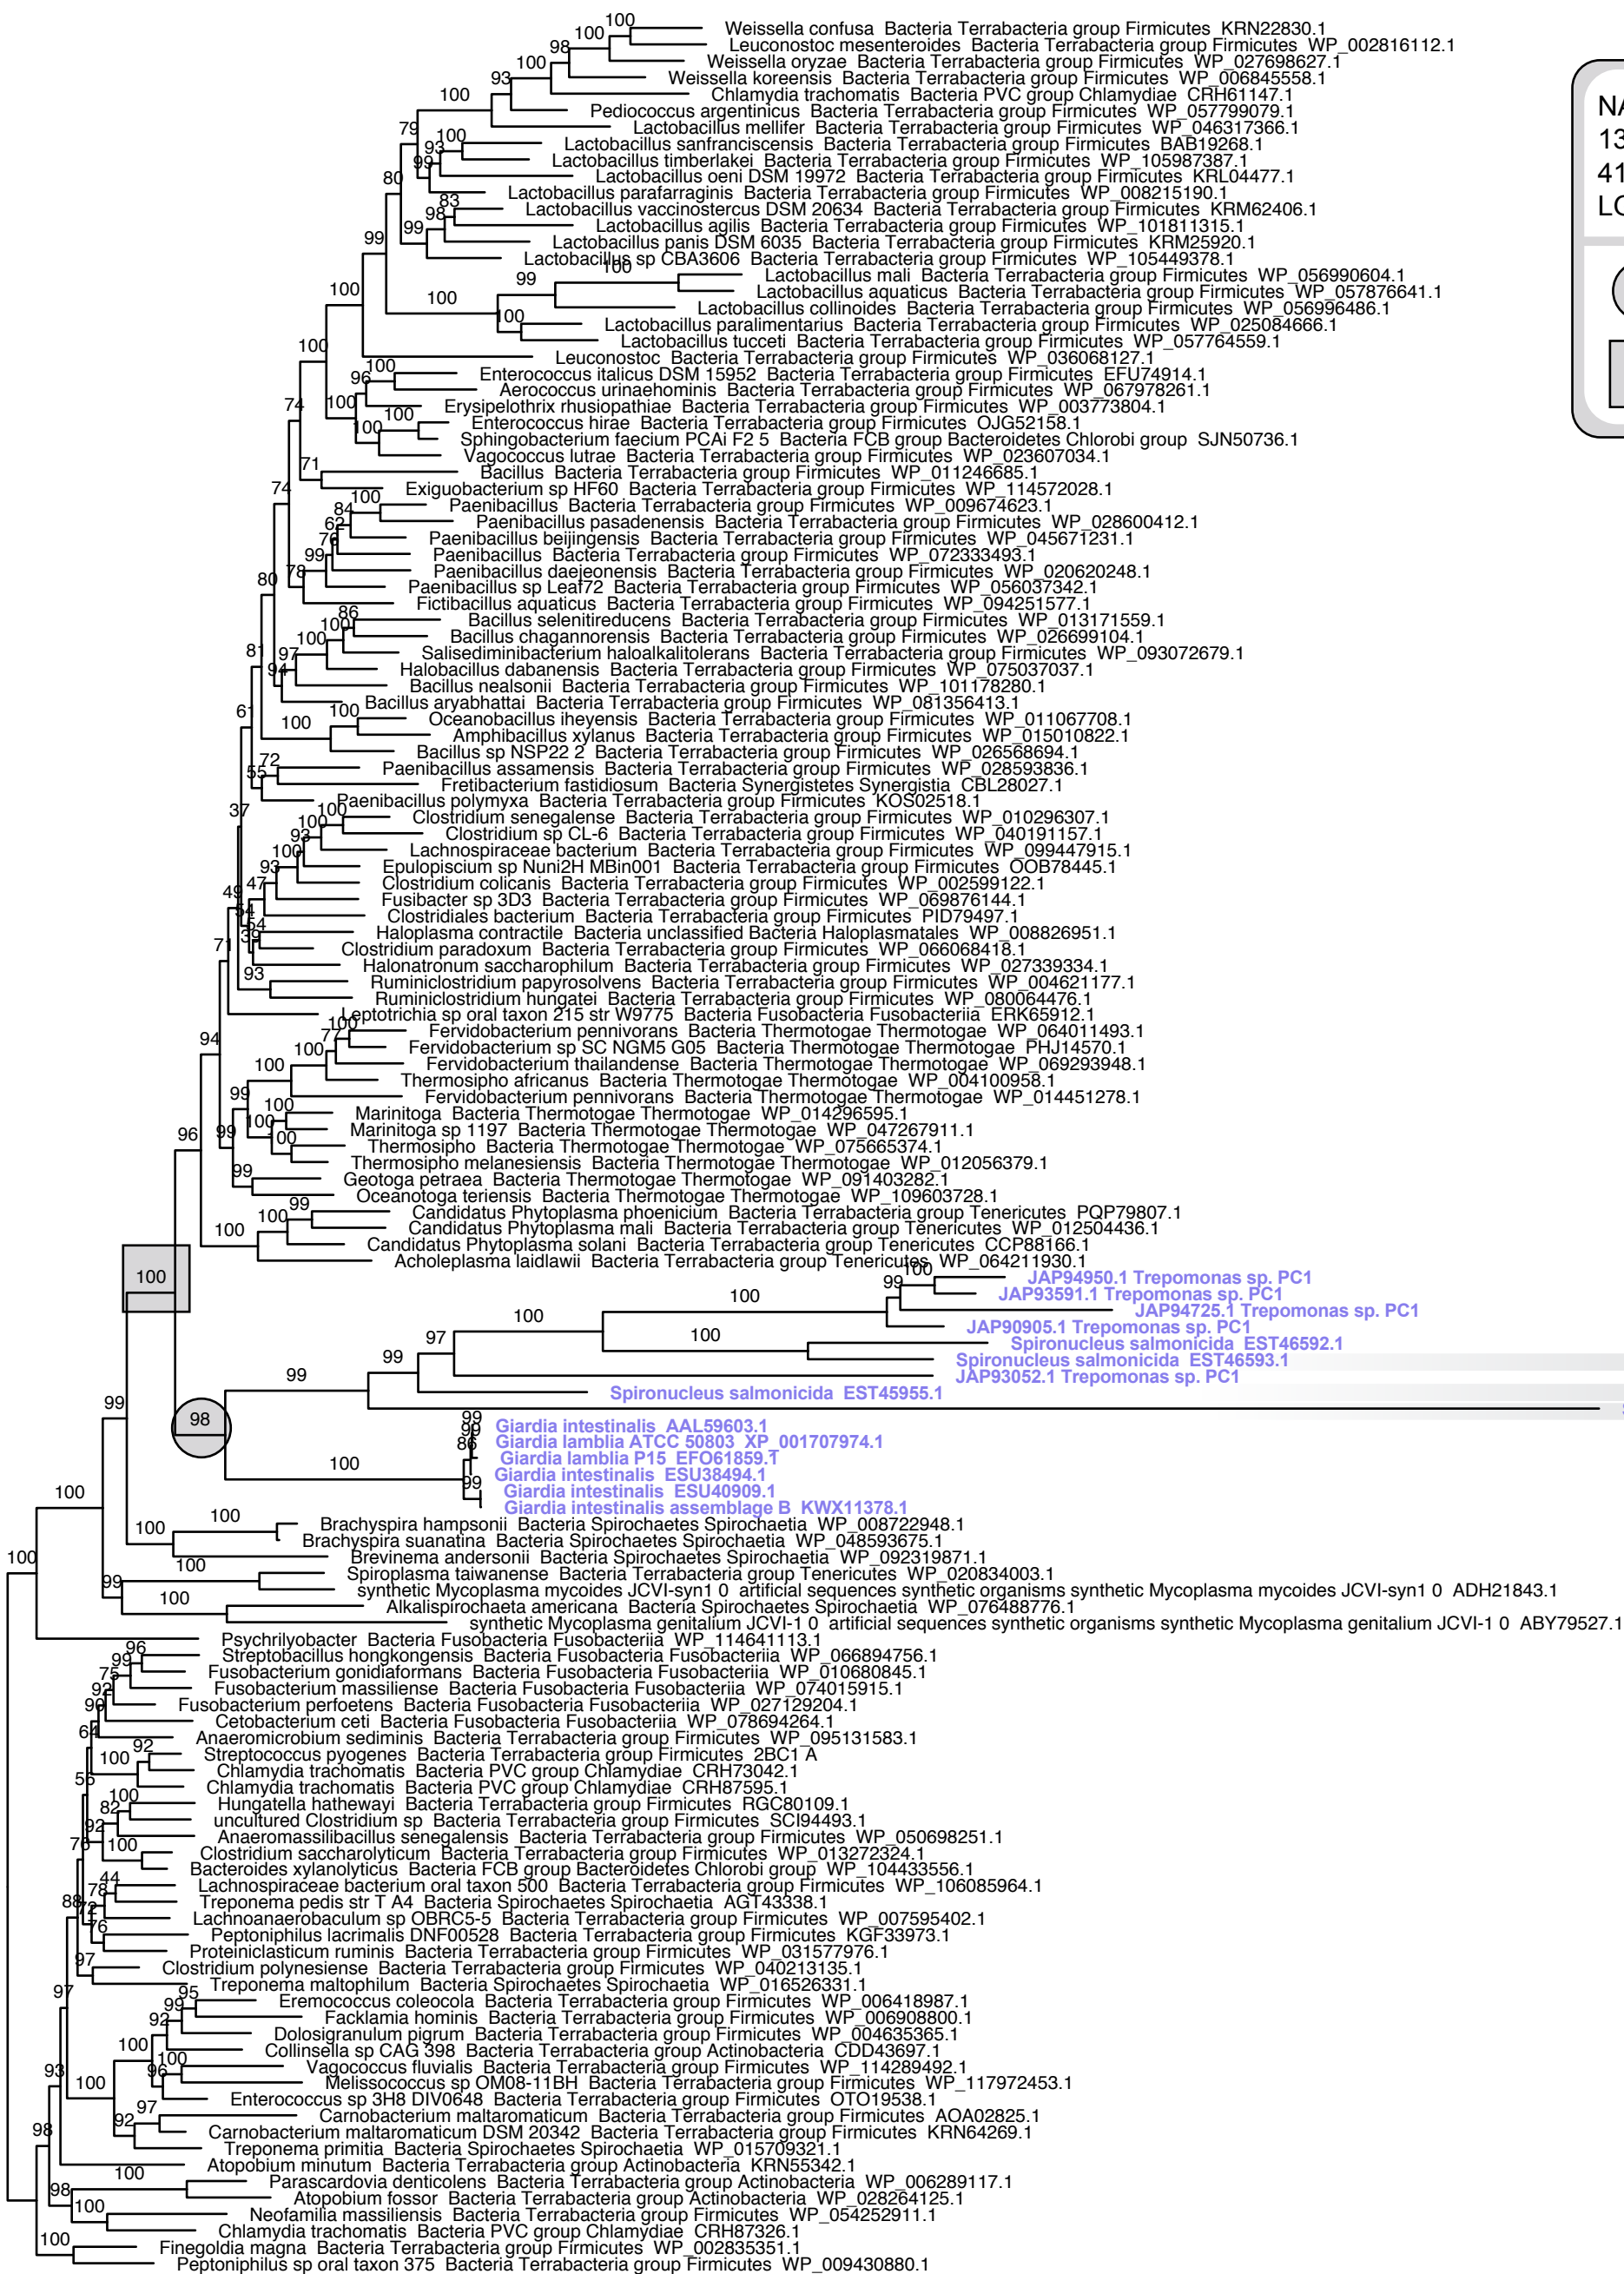

NADH oxidase  
137 sites  
417 taxa  
LG+C60+R6

Excavates  
Fornicates  
Eukaryotes  
Bacteria  
Archaea

○ Bipartition supporting Diplomonad monophyly  
□ Bipartition supporting sister relationship to prokaryotes



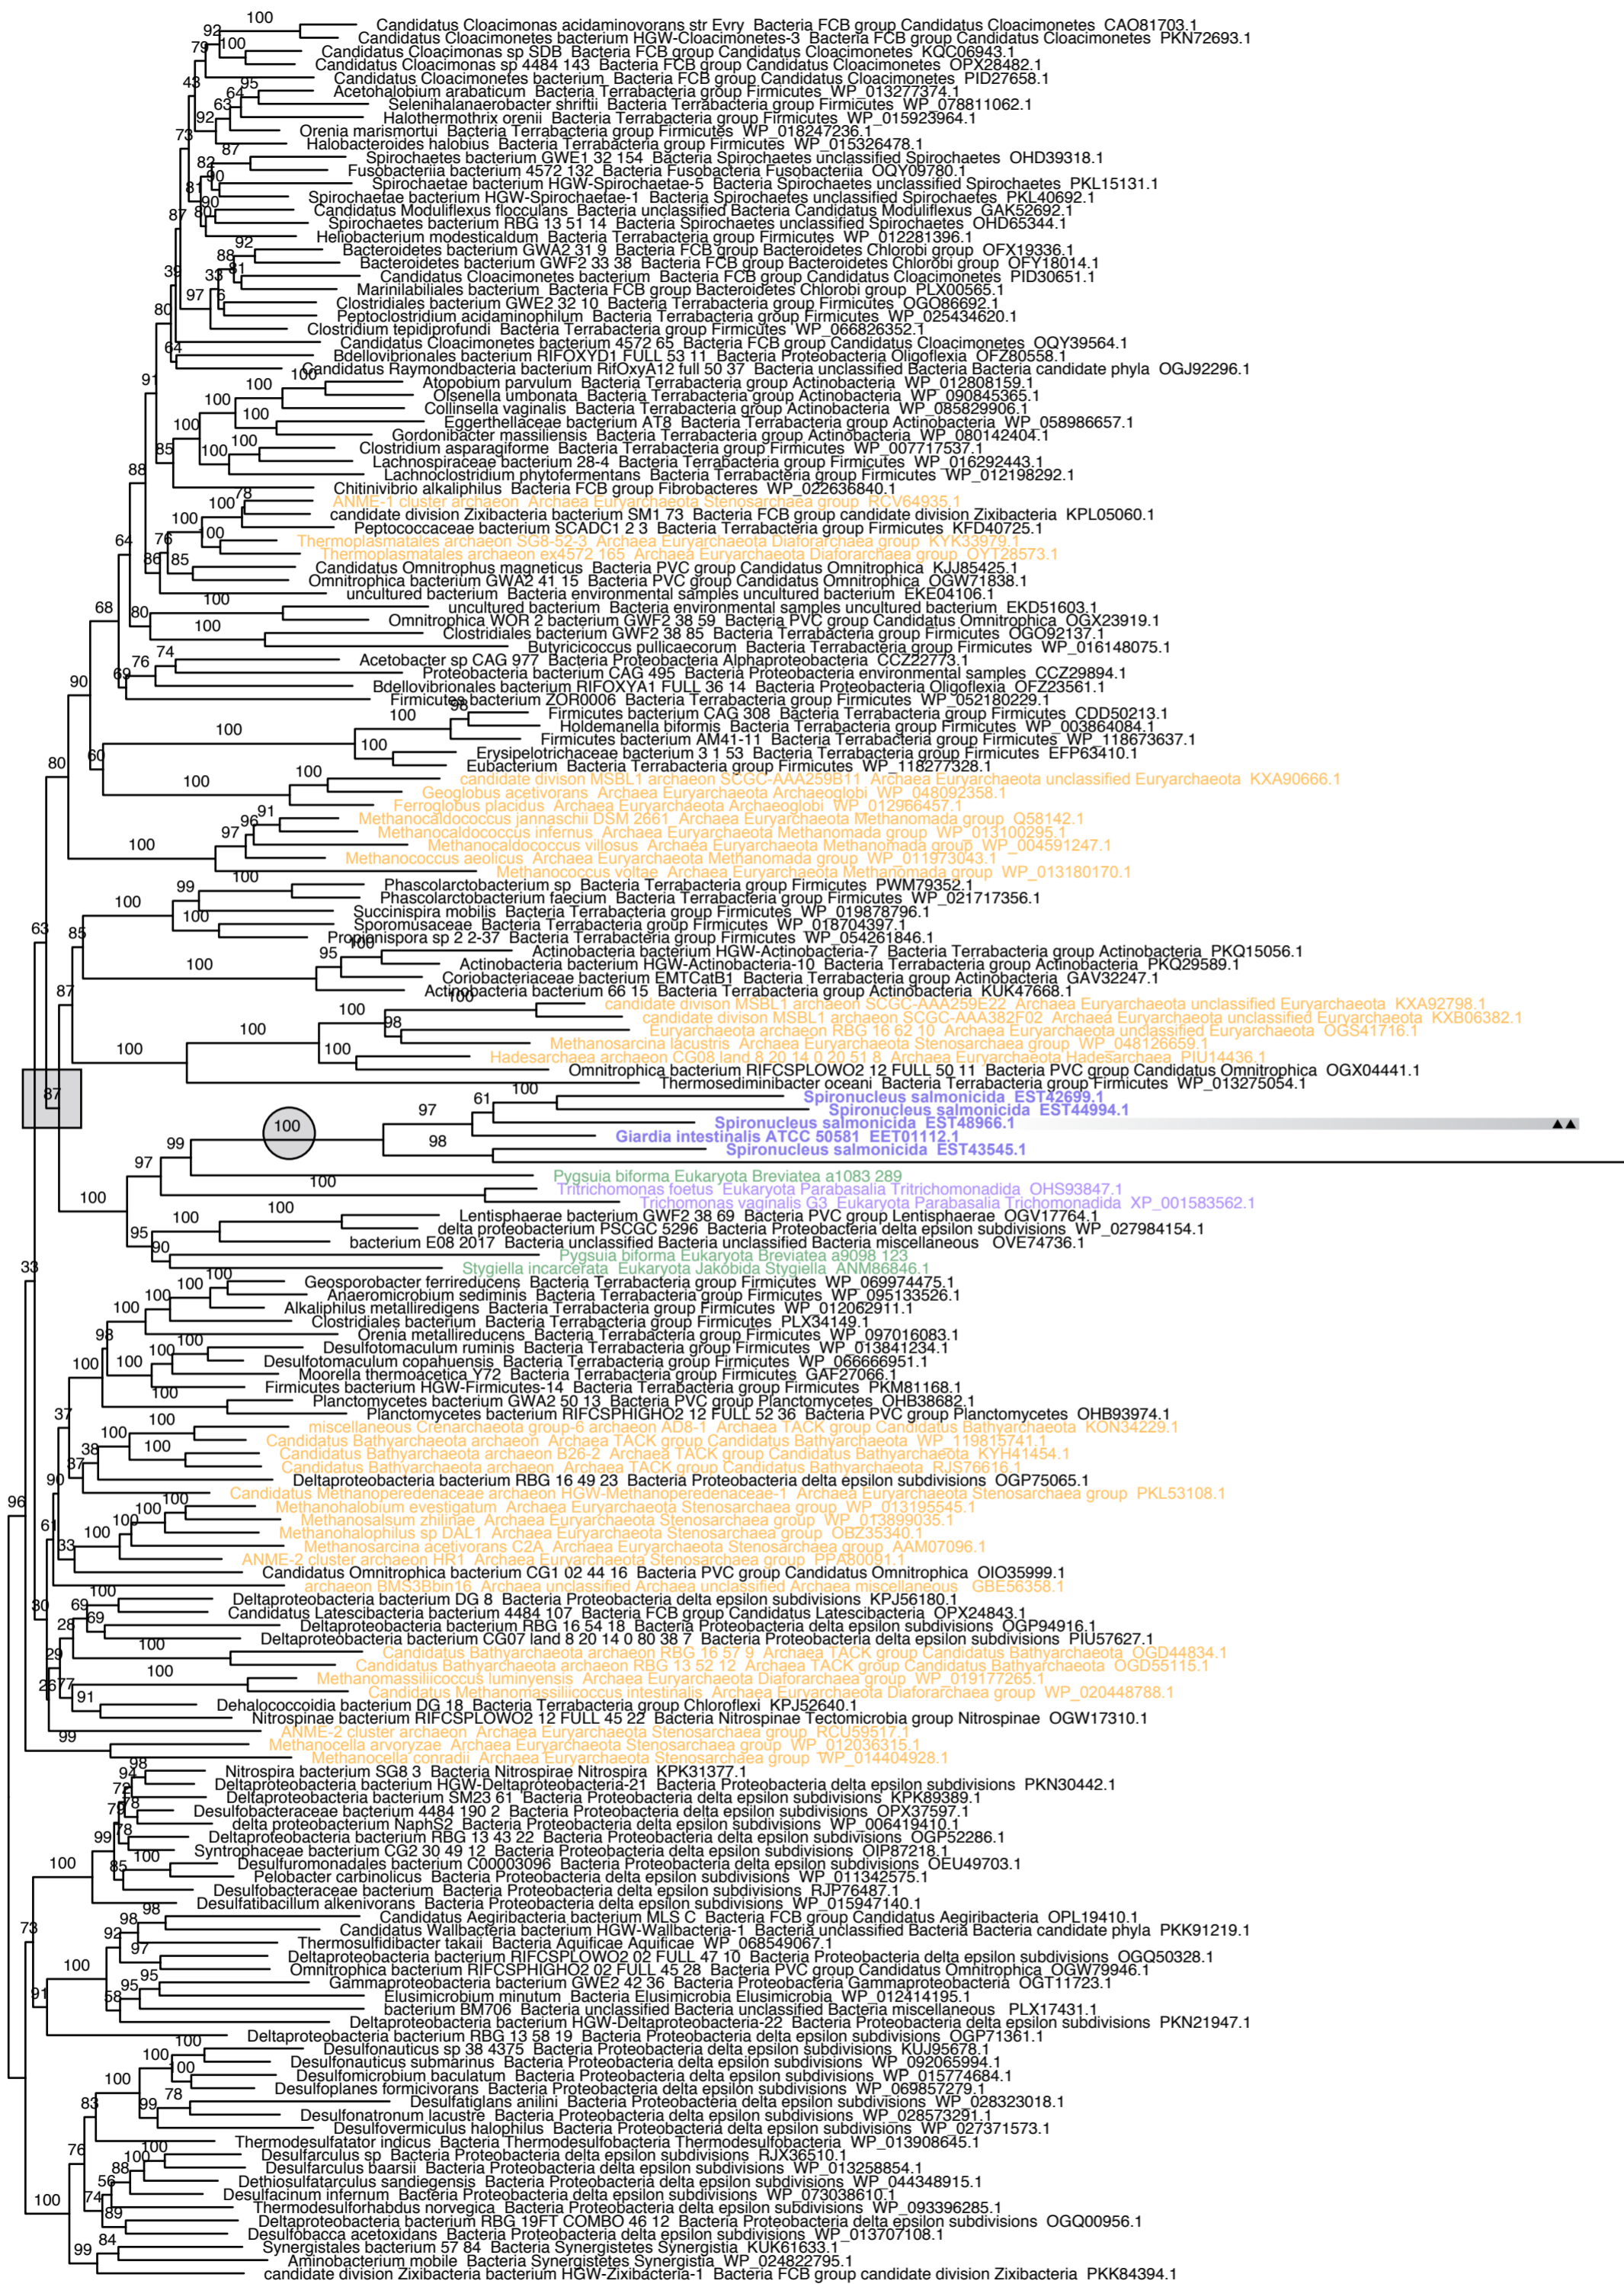

Flavodiiron Protein  
348 sites  
171 taxa  
LG+C60+G

Excavates  
Fornicates  
Eukaryotes  
Bacteria  
Archaea

○ Bipartition supporting Diplomonad monophyly  
□ Bipartition supporting sister relationship to prokaryotes



Superoxide reductase  
86 sites  
103 taxa  
LG+C50+G

Excavates  
Fornicates  
Eukaryotes  
Bacteria  
Archaea

○ Bipartition supporting Diplomonad monophyly  
□ Bipartition supporting sister relationship to prokaryotes

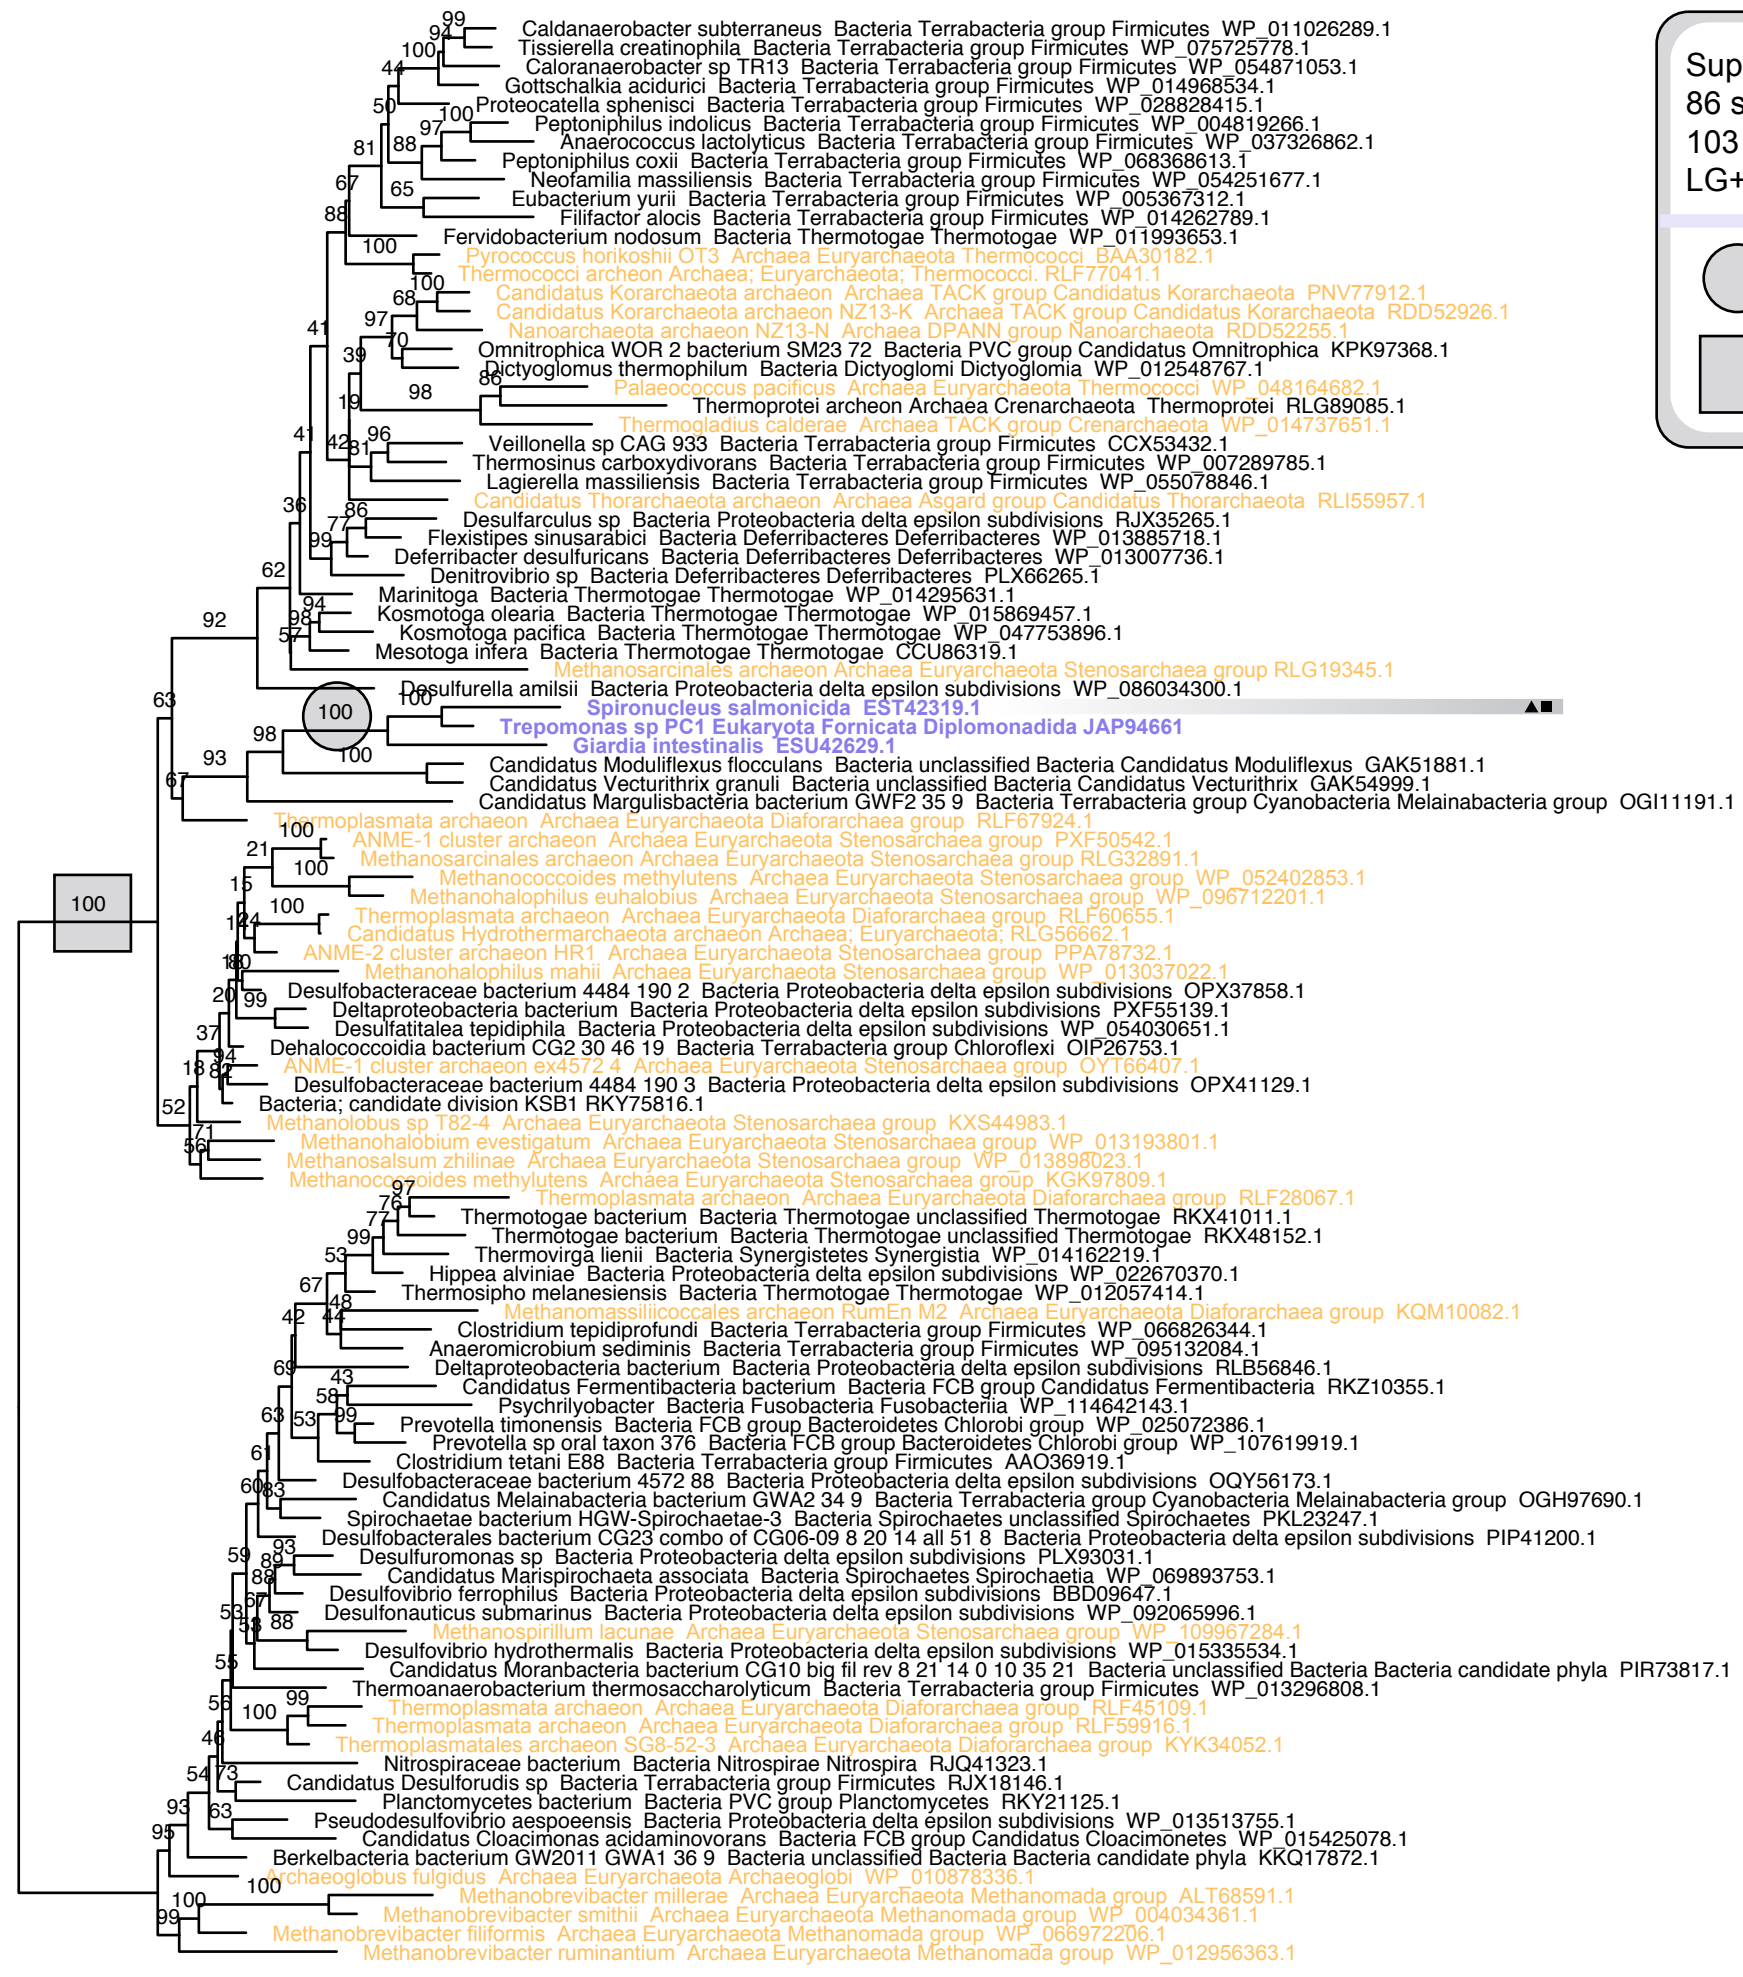

0.4



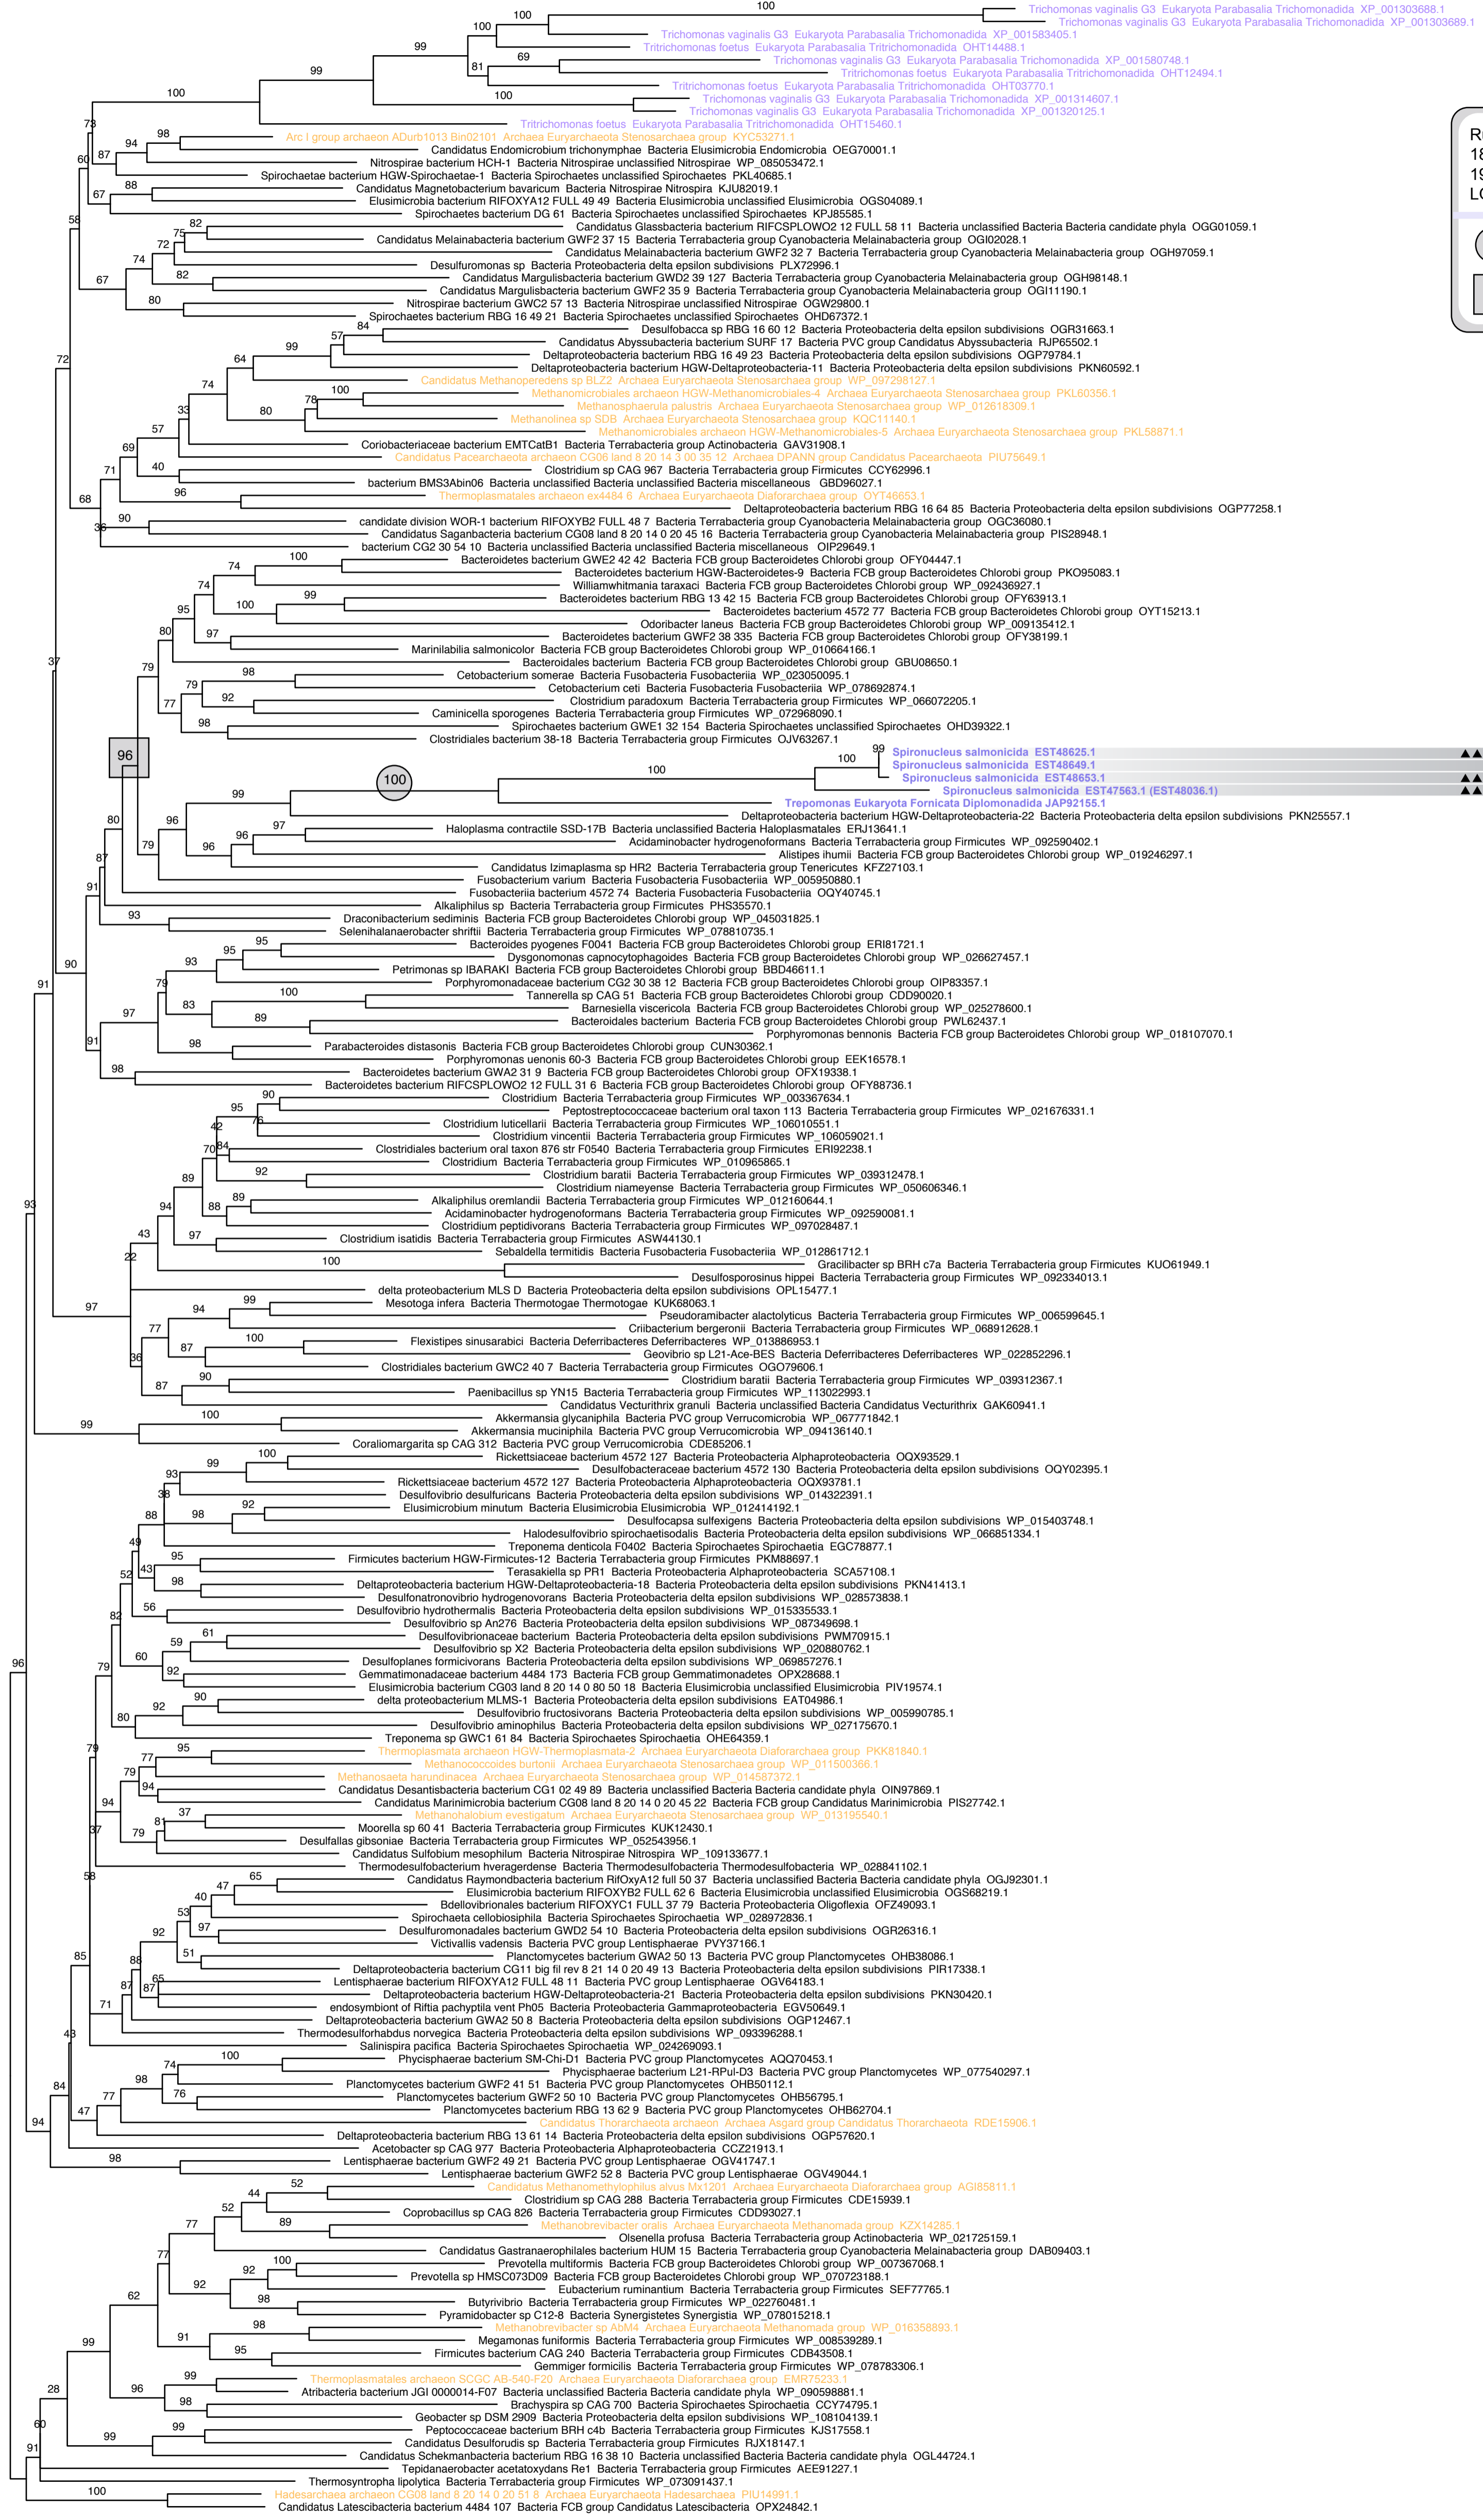

Rubryerthrin  
180 sites  
196 taxa  
LG+C60+F+I+G

Excavates  
Fornicates  
Eukaryotes  
Bacteria  
Archaea

● Bipartition supporting Diplomonad monophyly  
■ Bipartition supporting sister relationship to prokaryotes
