# Supplementary material for: Oxygen induces the expression of invasion and stress response genes in the anaerobic salmon parasite Spironucleus salmonicida
Source: PubMed Central journal article supplement (PMC6397501; doi:10.1186/s12915-019-0634-8), 2019-03-01

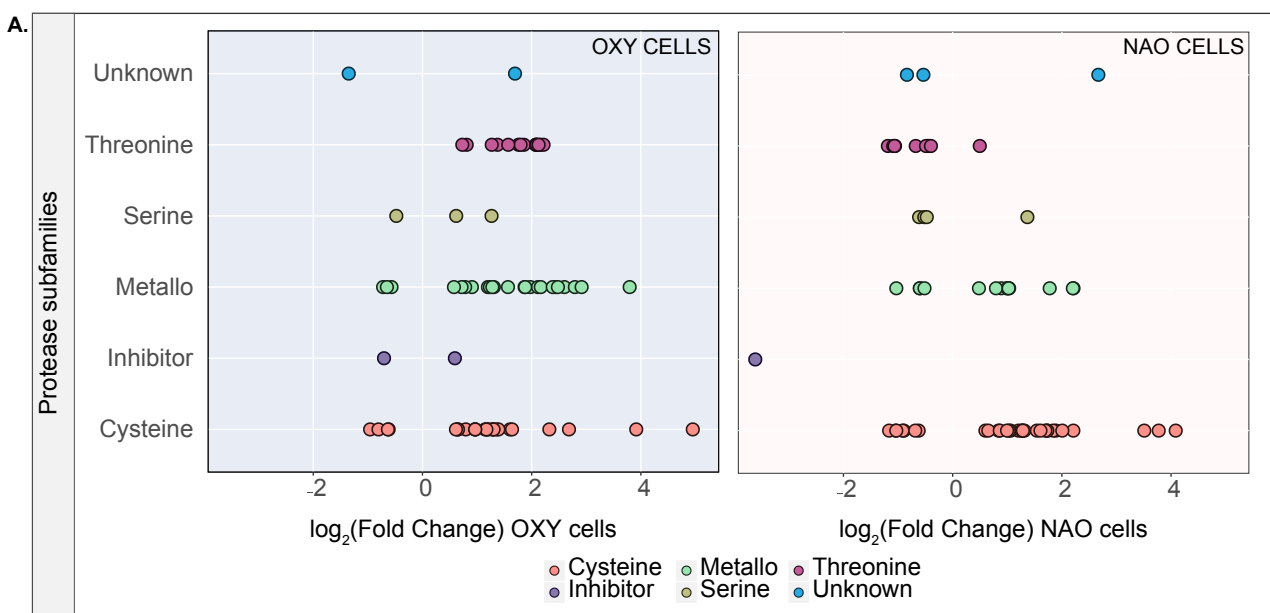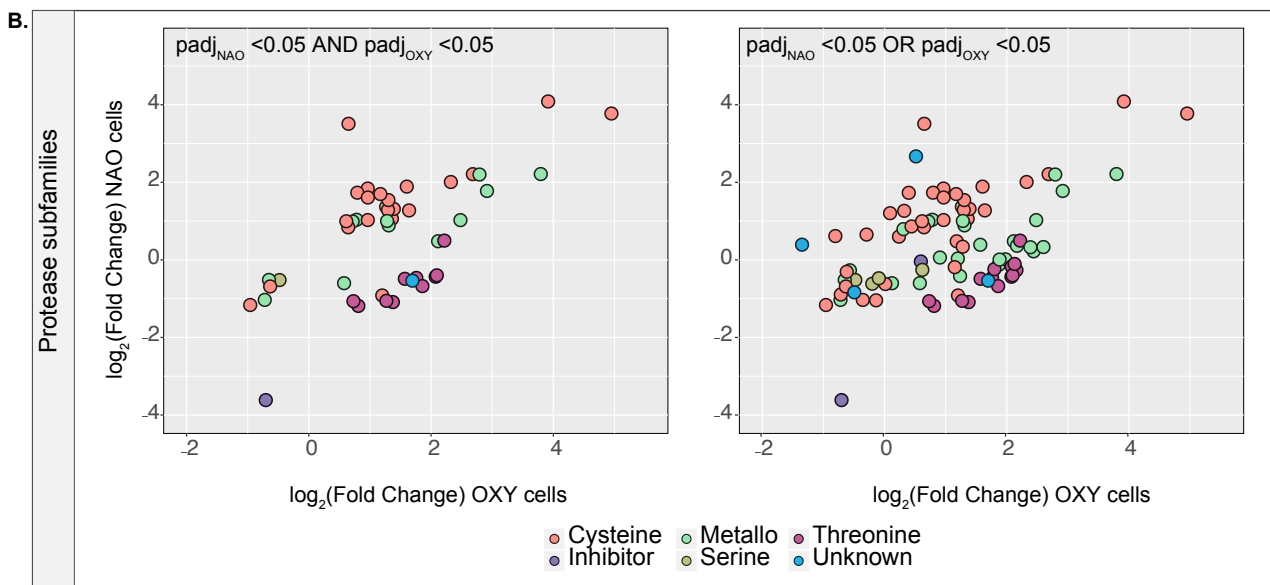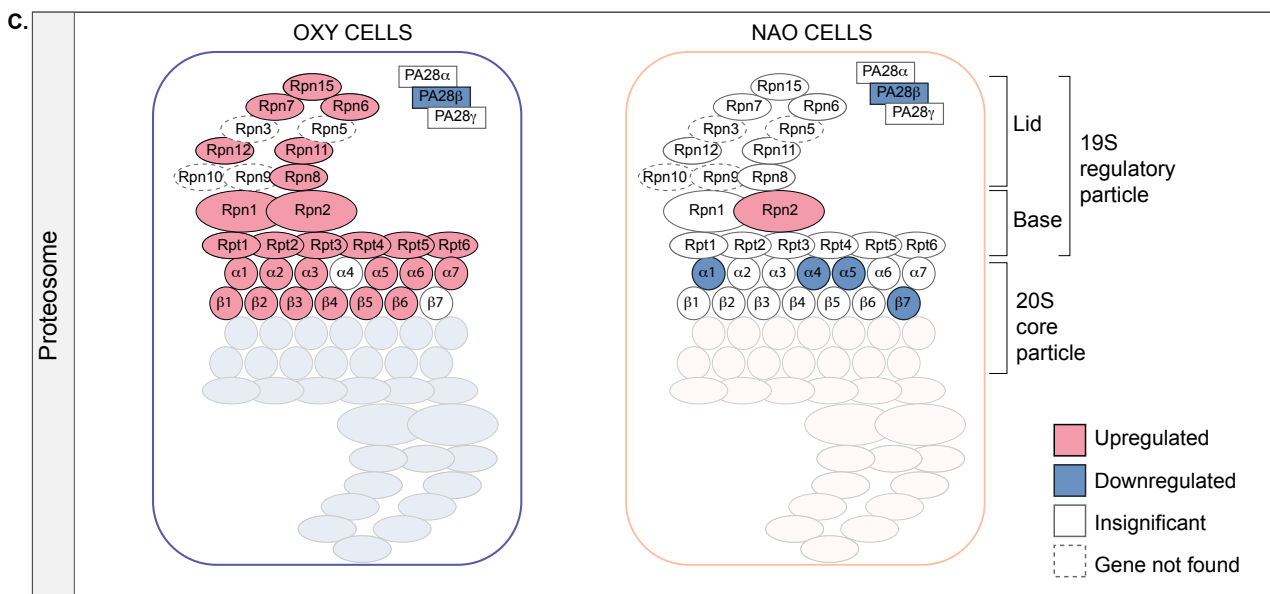

Supplement: 12915_2019_634_MOESM8_ESM.pdf [file 12915_2019_634_MOESM8_ESM.pdf]
