# Supplementary material for: Oxygen induces the expression of invasion and stress response genes in the anaerobic salmon parasite Spironucleus salmonicida
Source: PubMed Central journal article supplement (PMC6397501; doi:10.1186/s12915-019-0634-8), 2019-03-01
Supplement: 12915_2019_634_MOESM10_ESM.pdf [file 12915_2019_634_MOESM10_ESM.pdf]

OXY CELLS

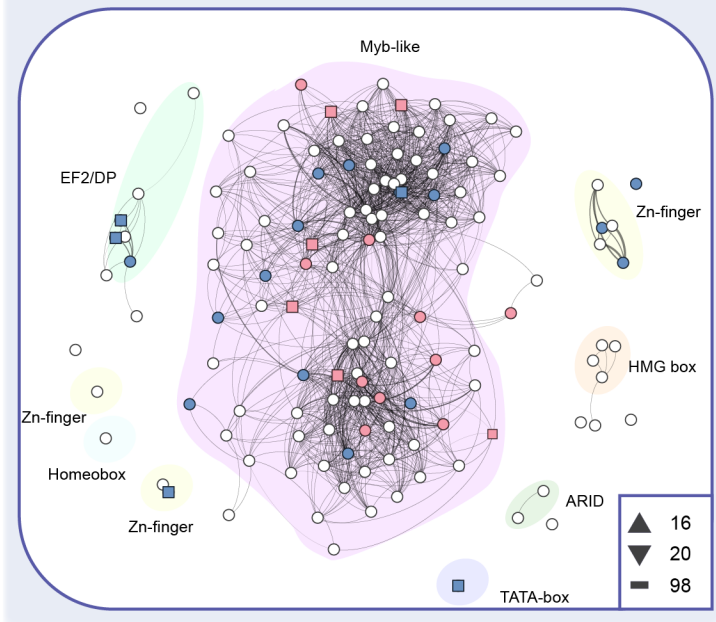

NAO CELLS

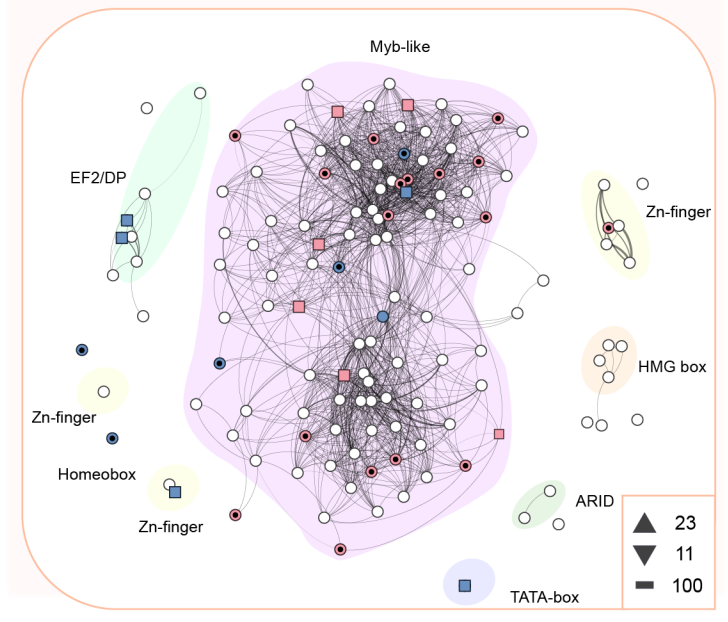

■ Similar regulation OXY and NAO cells

● Differential regulation only in NAO cells

● Differential regulation only in OXYcells

○ n.s./n.c.
