# Supplementary material for: Oxygen induces the expression of invasion and stress response genes in the anaerobic salmon parasite Spironucleus salmonicida
Source: PubMed Central journal article supplement (PMC6397501; doi:10.1186/s12915-019-0634-8), 2019-03-01
Supplement: 12915_2019_634_MOESM12_ESM.pdf [file 12915_2019_634_MOESM12_ESM.pdf]

# Transcriptomic analysis of *Spironucleus salmonicida* in response to oxygen stress with DESeq2

DESeq2 workflow for transcriptome analysis performed in Stairs et al. (in preparation). RNA was isolated from *Spironucleus* cells grown anaerobically (Control), in the presence of oxygen for 1 hour (OXY) and in media lacking antioxidants (NAO) (n=4 each).

Analysis performed following tutorials available on bioconductor:

<https://bioconductor.org/packages/release/bioc/vignettes/DESeq2/inst/doc/DESeq2.html#transcript-abundance-files-and-tximport-input>

## Import of necessary libraries and metadata

```
suppressMessages(library(DESeq2))
library("ggplot2")
```

Provide sample metadata file "samples.txt". Here, Control = anaerobic cells, NAO = no antioxidants and OXY = oxygen.

```
samples <- read.table("samples.txt", header = TRUE)
print(samples)
```

```
##           run condition
## 1  SSSCo01_S18.quant Control
## 2  SSSCo02_S19.quant Control
## 3  SSSCo03_S20.quant Control
## 4  SSSCo04_S21.quant Control
## 5  SSNA01_S26.quant   NAO
## 6  SSNA02_S27.quant   NAO
## 7  SSNA03_S28.quant   NAO
## 8  SSNA04_S29.quant   NAO
## 9  SSOx01_S22.quant   Oxy
## 10 SSOx02_S23.quant   Oxy
## 11 SSOx03_S24.quant   Oxy
## 12 SSOx04_S25.quant   Oxy
```

To make sure transcript IDs and gene IDs are consistent, we provide a transcript ID to gene ID mapping file necessary for import of salmon count data to DESeq2.

```
tx2gene <- read.table("tx2gene")
```

## Import of salmon quantification files to DESeq2

Next, import the quantification files (quant.sf) from the salmon output into a variable 'files'. Each sample is found in a subfolder (samples\$run) in a parent directory 'dir'.

```
files <- file.path(dir, samples$run, "quant.sf")
names(files) <- paste0(samples$run)
```

Reformat the salmon quantification data in a format suitable for DESeq2.

```
txi.salmon <- tximport(files, type = "salmon", tx2gene= tx2gene)
```

Import salmon quantification data into a DESeq2 object (ddsTxi) that is re-leveled against control samples containing only samples that had non-zero read counts. Run DESeq2.

```
ddsTxi <- DESeqDataSetFromTximport(txi.salmon, colData = samples, design=~condition)
ddsTxi$condition <- relevel(ddsTxi$condition, ref="Control")
dds <- ddsTxi[which(rowSums(counts(ddsTxi))>0),]
dds <- DESeq(dds)
```

## Table & Plot generation

### Pair-wise comparisons with control

We performed pair-wise comparisons for the two conditions (OXY and NAO) against the controls and stored these DESeq2 objects as 'results' variables `res.lhvsC` and `res.naovsC` respectively. These objects we converted to dataframes and combined in 'combined\_table\_all\_genes'. This dataframe was exported into a tsv file and additional analyses were performed in Microsoft Excel (Additional File 1).

```
res.lhvsC<-results(dds,contrast=c("condition", "Oxy", "Control"))
res.naovsC<-results(dds,contrast=c("condition", "NAO", "Control"))
combined_table_all_genes <- cbind(as.data.frame(res.lhvsC), as.data.frame(res.naovsC))
```

## Data transformation and PCA analysis

We used 'rlog transformation' for PCA plot visualizations. The rlog transformation of the data is stored in the `rld` variable.

```
rld <- rlog(dds, blind=TRUE)
```

Using modules from `ggplot2`, we generated the PCA plot shown in Figure 1B.

```
pcaData <- plotPCA(rld, intgroup=c("condition"), returnData=TRUE)
percentVar <- round(100 * attr(pcaData, "percentVar"))

PCA<- ggplot(pcaData, aes(PC1, PC2, color=condition)) +
  geom_point(size=3) +
  scale_colour_brewer(palette="Set2")+

  xlab(paste0("PC1: ",percentVar[1],"% variance")) +
  ylab(paste0("PC2: ",percentVar[2],"% variance")) +
  coord_fixed()
```

## Volcano plots

For the volcano plots, the results objects (`res.lhvsC` and `res.naovsC`) were filtered to only include genes with significant q-values (less than 0.05) to generate `res.lhvsC.Sig` and `res.naovsC.Sig`. These objects were filtered again to only include genes with an absolute fold change greater than 1.0 to generate `res.lhvsC.SigFC` and `res.naovsC.SigFC`.

```
res.lhvsC.Sig <- res.lhvsC[ which(res.lhvsC$padj < 0.05), ]
res.lhvsC.SigFC <- res.lhvsC.Sig[ which(res.lhvsC.Sig$log2FoldChange >1.0 | res.lhvsC.Sig$log2FoldChange < -1.0)
, ]

res.naovsC.Sig <- res.naovsC[ which(res.naovsC$padj < 0.05), ]
res.naovsC.SigFC <- res.naovsC.Sig[ which(res.naovsC.Sig$log2FoldChange >1.0 | res.naovsC.Sig$log2FoldChange < -
1.0), ]
```

Next, these objects were converted into dataframes for generating volcano plots `oxy_plot` and `nao_plot`

```
res.lhvsC.SigFC_df <- as.data.frame(res.lhvsC.SigFC)
res.naovsC.SigFC_df <- as.data.frame(res.naovsC.SigFC)

oxy_plot <- ggplot(res.lhvsC.SigFC_df, aes(log2FoldChange, -log10(padj))) + geom_point(size=0.5)
nao_plot <- ggplot(res.naovsC.SigFC_df, aes(log2FoldChange, -log10(padj))) + geom_point(size=0.5)
```

Using in-house annotations (`file=ColourMe`), we coloured various genes based on the predicted function (Figure 1C). These plots were written to SVG files and colours stylized in Adobe Illustrator (not shown).

```
colour_me <- as.data.frame(read.table("ColourMe", row.names=1))
res.lhvsC.SigFC_df$genename <- rownames(res.lhvsC.SigFC_df)

oxy_plot_colour <- oxy_plot + geom_point(data=filter(res.lhvsC.SigFC_df[rownames(colour_me),], padj<0.05), si
ze=1)
nao_plot_colour <- nao_plot + geom_point(data=filter(res.lhvsC.SigFC_df[rownames(colour_me),], padj<0.05), si
ze=1)
```
